# Supplementary material
Source: publisher figshare collection journal article supplement (https://rs.figshare.com/ndownloader/files/22680491)
Supplement: Supplementary file 1 [file 22680491]

## Sheet: Sheet1
Dynamics of diet-egg transfer of fatty acids in the teleost fish, red drum (Sciaenops ocellatus)
Zhenxin Hou, Cynthia K. Faulk and Lee A. Fuiman
Philosophical Transactions B of the Royal Society
Supplementary Document D3. Fatty acid profiles of items used to compose broodstock diets. Fatty acids are expressed as mg per g dry weight.
Year	Source	Feed	Species	14:0	15:0	16:0	16:1n-7	16:2n-4	17:0	16:3n-4	18:0	18:1n-9	18:1n-7	18:2n-6	18:3n-6	18:3n-4	18:3n-3	18:4n-3	20:1n-9	20:2n-6	20:3n-6	20:4n-6	20:3n-3	20:4n-3	20:5n-3	22:1n-11	22:4n-6	22:5n-6	22:5n-3	22:6n-3
2012	FAML	Algamac 3050 capsule		47.9544	3.80849	102.371	0.678056	0	0.221904	1.98238	2.25878	0.42785	0.226119	0.243281	0.960479	0	1.34317	2.2925	0	0.205645	7.55406	5.16973	2.29491	0	6.33374	0	0.470002	1.13511	83.1922	232.994
2010-2012	FAML	Algamac ARA capsule		8.5	0.5	54.6	2.1	0.1	1.3	0.3	29.9	40.9	2.1	35.3	11.7	0.8	0.6	0	1.4	1.8	10.3	125.1	0.1	0	5.6	0.2632	0.357698	0	6.2	27.1
2011-2011	FAML	brown shrimp	Farfantepenaeus aztecus	0.436628	0.140734	12.6763	1.21651	0.0905202	0.512108	0.150266	4.30144	13.0024	2.22714	10.4148	0.130694	0.110648	0.565633	0.0822446	0.479844	1.11123	0.184765	1.37226	0.13079	0.183781	4.2251	0.1	0.2	0.102143	0.434488	3.96805
2011	TPWD	brown shrimp	Farfantepenaeus aztecus	0.28171	0.153791	9.63012	0.822444	0.0410469	0.320095	0.304656	3.65391	10.6585	0.853393	8.43871	0.0954489	0.0509257	0.521594	0.0462152	0.43518	0.908561	0.12533	1.18043	0.114668	0.172004	4.33583	0.0256788	0.0740627	0.101229	0.40495	3.02979
2012	TPWD	brown shrimp	Farfantepenaeus aztecus	0.837971	0.44792	5.88289	2.18325	0.215573	0.641551	0.641547	3.04837	3.12528	1.13823	0.691482	0.19165	0.0365183	0.413037	0.353361	0.669958	0.408547	0.0944799	1.86055	0.125368	0.151324	5.15914	0.497328	0.249949	0.217247	0.587708	5.31359
2011-2012	FAML	brown shrimp	Farfantepenaeus aztecus	0.791902	0.586527	4.47263	1.6148	0.166845	0.553232	0.438628	2.31213	2.3295	0.746724	0.577	0.171235	0.0482815	0.289793	0.167669	0.24117	0.242082	0.0653508	2.04765	0.0184825	0.123801	4.69289	0.0314112	0.274003	0.293908	0.4452	4.84876
2011-2012	FAML	white shrimp	Litopenaeus setiferus	0.974603	0.633698	5.15732	2.36188	0.244843	0.667575	0.689646	2.80465	2.72107	1.50618	0.802718	0.185354	0.0539742	0.256462	0.119867	0.480465	0.339006	0.171132	2.88553	0.0671379	0.163455	5.42355	0.177454	0.211361	0.243984	0.590854	4.02029
2012	TPWD	beef liver		2.91238	0.368002	24.5933	3.43696	0.106899	1.32368	0.702876	32.3257	29.2391	0.987072	21.5043	0.437522	0.0287655	0.601495	0.243521	0.406945	0.197113	5.46567	12.9594	0.0325478	0.157978	0.496956	0	3.12702	0.618334	1.97353	1.32453
2011-2012	TPWD	mackerel	Scomber scombrus	4.22076	1.3334	17.1367	5.4635	2.13227	1.34283	0.698457	8.57002	10.7066	3.0608	1.68847	1.13109	0.257969	0.87612	1.50848	1.56555	0.391631	0.275323	4.37973	0.21729	0.573214	7.97989	0.524159	0.811355	1.63329	3.70621	24.7568
2012	FAML	sardine	Sardinella aurita	3.97892	0.923883	17.1141	4.12474	0.896052	0.949045	0.49194	4.44767	4.91671	1.88057	1.02079	0.392199	0.0476408	0.426302	0.37224	0.302892	0.137293	0.0756087	1.86529	0	0.137134	4.39889	0	0.150115	0.696897	0.663202	12.7039
2010-2013	FAML	squid	Loligo opalescens	2.26002	0.376018	17.2996	1.43208	0.268117	0.495777	0.183579	2.9674	3.5406	1.45494	0.543262	0.17283	0.0872477	0.302898	0.381609	4.01479	0.261555	0.0396883	1.23371	0.437518	0.228902	11.075	1.83492	0.107653	0.254022	0.416031	24.2844
2013	TPWD	brown shrimp	Farfantepenaeus aztecus	0.403738	0.331532	3.75798	1.77077	0.166921	0.547115	0.498127	2.35497	2.48124	1.43884	0.50776	0.142945	0.0890823	0.13133	0.0918763	0.529721	0.323932	0.108032	2.08012	0.0722906	0.0792794	6.4044	0	0.249772	0.276525	0.626411	4.99999
2013	FAML	Vitalis CAL		8.34181	0.631662	25.8568	10.5695	2.02236	0.662067	2.12114	5.55018	22.2974	3.84617	10.0438	0.530769	0.33809	2.06392	2.79519	2.24423	0.394419	0.549533	2.16026	0.226146	1.02293	19.8571	1.41803	0.209736	0.39779	2.81085	15.1283
2014	FAML	brown shrimp	Farfantepenaeus aztecus	1.02279	0.570365	5.7727	3.02452	0.243814	0.697513	0.722595	2.5525	2.64056	1.59157	0.613766	0.176115	0.0200642	0.22066	0.0960611	0.574021	0.371999	0.193153	2.62245	0.0722737	0.0845963	6.49922	0.0853508	0.486661	0.307879	0.830068	4.29628
2014	FAML	soy lecithin		0.339801	0.268913	78.7718	0.705508	0.0397469	0.634088	0.304845	18.6259	36.1521	5.12984	267.714	0	0	33.006	0.503313	0.990568	0.16227	0.183386	0	0	0.540221	1.95319	0	0	0	1.22949	0
2014	FAML	sardine	Sardinella aurita	12.437	2.07118	42.0928	16.5246	2.789	2.05743	1.44762	9.97376	16.4043	6.18649	2.52812	1.0691	0.102249	1.74618	2.48449	0.664699	0.304785	0.477881	2.88069	0.17743	0.814869	19.0159	0	0.561136	1.19456	2.41696	35.9682
2014	FAML	squid	Loligo opalescens	2.22267	0.296212	14.3135	0.580752	0.0962444	0.390375	0.139609	2.97432	1.61979	0.977466	0.213669	0.126595	0.0607065	0.0913025	0.163951	2.37905	0.1942	0.0260491	1.46034	0.314757	0.155299	14.1942	0.0321003	0.146295	0.234588	0.33212	25.924
2018	FAML	beef liver		0.973379	0.306285	19.2036	1.24183	0.318123	1.05018	0.577351	30.8575	20.2674	1.37218	9.58722	0.257306	0.0505452	1.07507	0.0360032	0.263624	0.152808	6.06542	9.78571	0.0914038	0.761167	0.913139	0.0573595	2.66806	0.443645	5.0095	1.21749
2018	TPWD	mackerel	Scomber scombrus	13.1431	0.926092	29.5315	6.5431	1.72354	0.53927	0.947165	5.76951	23.3276	4.27046	2.9622	0.115785	0.100668	1.48733	4.25664	20.9706	0.519269	0.322541	1.20479	0.277436	1.13095	8.84327	42.3472	0.264757	0.356762	1.81592	16.9676
2018	FAML	sardine	Sardinella aurita	3.70228	1.33365	23.5139	2.62699	0.830697	1.29904	0.350278	6.1264	6.58032	2.02505	0.893057	0.459036	0.044357	0.297842	0.198696	0.248359	0.163931	0.224386	1.08988	0.0602333	0.110281	1.56357	0.0959173	0.0900475	0.455992	0.228932	7.97655
2018	FAML	shrimp	Farfantepenaeus aztecus	0.64289	0.453084	4.8802	1.49389	0.139698	0.70564	0.487126	3.23155	2.5958	1.37321	0.757671	0.150316	0.0604153	0.201479	0.0623362	0.254398	0.354077	0.165418	2.16794	0.0878804	0.163138	4.82805	0.138576	0.289275	0.3022	0.536024	3.90318
2018	FAML	squid	Loligo opalescens	4.67526	0.513585	31.0349	2.51423	1.27167	0.470725	0.389035	3.8241	12.1219	5.41943	0.912377	0.110829	0.187673	0.837767	1.06988	3.37529	0.423165	0.18677	1.60058	0.444439	0.749424	18.044	1.75126	0.109733	0.253567	0.677897	29.632
